# Supplementary material
Source: publisher figshare collection journal article supplement (https://brill.figshare.com/articles/dataset/_/7776332)
Supplement: Supplementary file 1 [file 1]

Lecture 10

**Theories of metaphor: a synthesis**

the theory of metaphor as categorization,

“standard” conceptual metaphor theory,

blending theory, the neural theory of metaphor,

conceptual metaphor theory as based on the idea of main meaning focus,

and relevance theory.

“This surgeon is a butcher.”

**Introduction**

I will use this example to assess the various approaches in order to see how they are related.

I will be characterizing the theories as objectively as possible (i.e., as the authors themselves characterize them) and I will be assuming that the theories are all valid as they stand.

Toward the end of the paper, I will ask which one or ones of the cognitive mechanisms are needed to account for the construction of the meaning of the sentence.

**The Categorization View of Metaphor**

an entity is assigned to a category that is exemplified by or typical of another entity also belonging to that category. - property “bungling, atrocious worker.”

**“Standard” Conceptual Metaphor Theory**

the butcher  the surgeon

the tool used: the cleaver the tool used: the scalpel

the animal (carcass)  the human being

the commodity  the patient

the abattoir  the operating room

the goal of severing meat  the goal of healing

the means of butchery  the means of surgery

the sloppiness, carelessness of the butcher  the sloppiness, carelessness of the surgeon

**Blending**


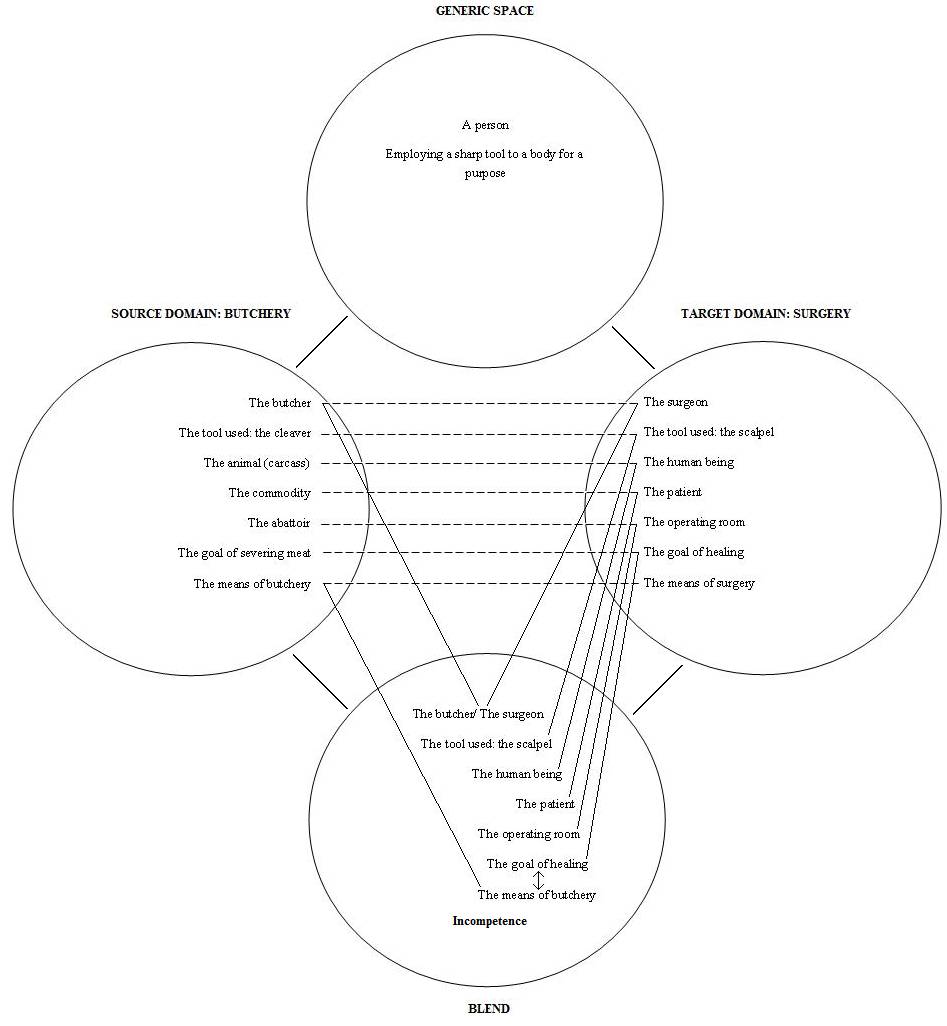


Figure 1. The surgeon as butcher blend.

**Lakoff ’s Extended Theory**

a person who performs actions with certain characteristics is a member of a profession known for those characteristics.

**Conceptual Metaphor Theory as Based on the Idea of the Main Meaning Focus**

Each source is associated with a particular meaning focus (or foci) that is (or are) mapped onto the target. This meaning focus (or foci) is (are) constituted by the central knowledge that pertains to a particular entity or event within a speech community. The target inherits the main meaning focus (or foci) of the source.

“central knowledge”: Following Langacker (1987: 158-161), I take central knowledge to be knowledge about an entity or event that is conventional, generic, intrinsic, and characteristic.

“making of a strong building,” which maps onto the “creation/construction of a stable/lasting complex system” (Kövecses, 2000: 82-83). (such as *construct*, *strong*, *fall apart*, *foundation*, *framework*)

The correspondences between “building/making and creation/construction, “strength and stability/lastingness,” and “building and complex abstract system” are “central mappings.”

meaning focus may not be fixed advance and inherent in concepts: It may emerge, for instance, in contrastive contexts, when we compare one concept to another and find that a particular meaning focus arises in one of the concepts as a result of a contrast.

1 a: a person who slaughters animals or dresses their flesh b: a dealer in

meat

2: one that kills ruthlessly or brutally

3: one that bungles or botches

4: a vendor especially on trains or in theaters

category for its property: *butcher* is used in the sentence to metonymically indicate sloppiness, and so on.

surgeon, pig, and bull, all of which display different specific meaning foci by means of the same metonymy.

why do we see the movements of the butcher as “careless, sloppy, imprecise”?

we interpret the butcher’s actions in reference to the surgeon’s work.

we conceptualize how the butcher works with the surgery frame in the background.

“careless and sloppy,” and, hence, “incompetent,” will now constitute the (new) meaning focus of the concept of butcher.

This newly derived meaning will then be projected to, and will characterize, the particular surgeon as well.

projection of “careless and sloppy” to the frame (i.e., target domain) of surgery as an example of cross-domain mapping.

But we can also think of it as a case of conceptual integration.


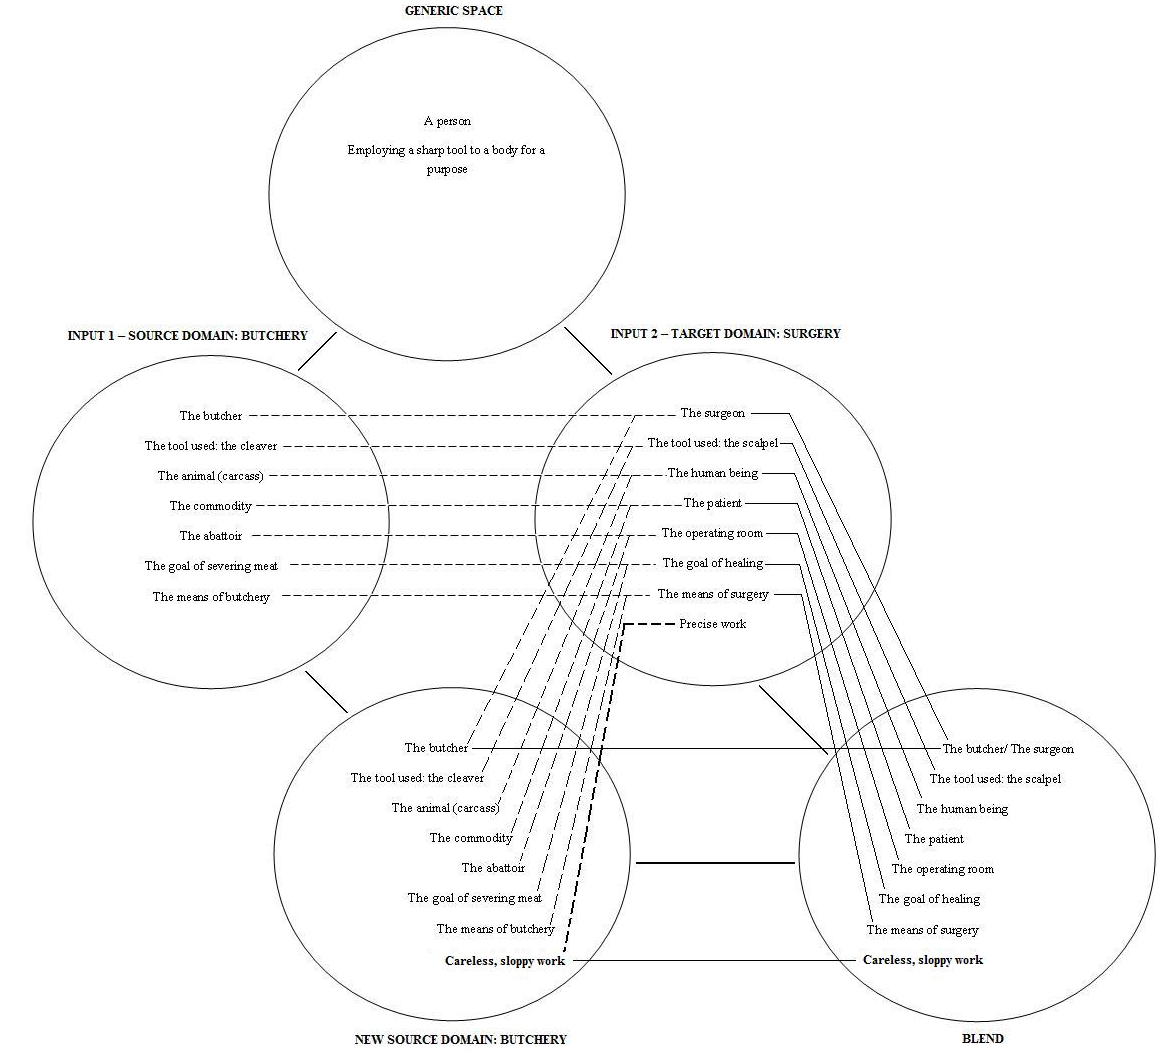


Figure 2. The new surgeon as butcher blend in the “main meaning focus” view.

**How Do These Analyses Fit Together?**

surgery is butchery metaphor

a person who performs actions with certain characteristics is a member of a profession known for those characteristics metaphor(ic blend)

the whole category for a characteristic property of the category metonymy

The generic space of surgery and butchery

surgery as conceptual background (to interpreting butchery)

Sperber and Wilson (2008) regard the understanding of the sentence as an inferential process that does not make use of metaphor, metonymy, or blending. On their account, “The inferential path to an adequate understanding of (30) [i.e., the sentence “This surgeon is a butcher”] involves an evocation of the way butchers treat flesh and the construction on that basis of an ad hoc concept butcher*, denoting people who treat flesh in the way butchers do. ... For a butcher, being a butcher* is a quasi-pleonastic property. For a surgeon, on the other hand, it does imply gross incompetence …” (p. 97).

a category with a property for all individuals with that property.

**Conclusion**

No single theory explains everything about the process of meaning construction required for the sentence. In this sense, the different theories fit together and complement each other in a natural way.

**References**

Barnden, J.A. (2006) “Artificial intelligence, figurative language and cognitive linguistics.'' In G. Kristiansen et al. (eds.) *Cognitive Linguistics: Current Applications and Future Perspectives*, pp.431-459. Berlin: Mouton de Gruyter.

Brandt, Line and Per Aage Brandt. 2005. Making sense of a blend. A cognitive semiotic approach to metaphor. *Annual Review of Cognitive Linguistics*, Volume 3. 216-249.

Fauconnier, Giles and Mark Turner. 2002. *The Way We Think*. New York: Basic Books.

Gibbs, Raymond, ed., 2008. *The Cambridge Handbook of Metaphor and Thought*. New York: Cambridge University Press.

Gibbs, R. and Tendahl, M. 2006. “Cognitive effort and effects in metaphor comprehension: Relevance theory and psycholinguistics.” *Mind and Language* 21:3, 379-403.

Glucksberg, Sam and Boaz Keysar. 1993. How metaphors work. In A. Ortony, ed., *Metaphor and Thought*, 2nd ed., 401-424. New York: Cambridge University Press.

Grady, Joseph E., Todd Oakley, and Seana Coulson. 1999. Blending and metaphor. In *Metaphor in Cognitive Linguistics*, eds. Raymond Gibbs and Gerard Steen, 101–124. Amsterdam: John Benjamins.

Kövecses, Zoltán. 2000. The scope of metaphor. In A. Barcelona (ed.) *Metaphor and Metonymy at the Crossroads.* Berlin: Gruyter. 79-92.

Kövecses, Zoltán. 2002. *Metaphor. A Practical Introduction*. Oxford: Oxford University Press.

Kövecses, Zoltán. 2010. *Metaphor. A Practical Introduction*. Second edition. Oxford: Oxford University Press.

Kövecses, Zoltán and Günter Radden. 1998. Metonymy: Developing a cognitive linguistic view. *Cognitive Lingguistics* 9: 37–77.

Lakoff, George. 1993. The neural theory of metaphor. In A. Ortony, ed., *Metaphor and Thought*. New York: Cambridge Universtiy Press.

Lakoff, George. 2008. The neural theory of metaphor. In R. Gibbs, ed., *The Cambridge Handbook of Metaphor and Thought*, 17-38. New York: Cambridge Universtiy Press.

Lakoff, George and Mark Johnson. 1980. *Metaphors We Live By*. Chicago: The University of Chicago Press.

Lakoff, George and Mark Johnson. 1999. *Philosophy in the Flesh*. New York: Basic Books.

Ortony, Andrew, ed., 1993. *Metaphor and Thought*, 2nd edition. New York: Cambridge University Press.

Ruiz de Mendoza Ibanez, Francisco Jose. 1998. On the nature of blending as a cognitive phenomenon. *Journal of Pragmatics*, 30, 259-274.

Ruiz de Mendoza Ibanez, Francisco Jose. 2009. Review of Rosa E. Vega Moreno: Creativity and Convention.The Pragmatics of Everyday Figurative Speech. Amsterdam: Benjamins. *Journal of Pragmatics*, 41, 193-196.

Ruiz de Mendoza Ibáñez, F. J. and Pérez Hernández, L. 2003. Cognitive operations and pragmatic implication, in Panther, K. & Thornburg, L. (eds.), *Metonymy and Pragmatic Inferencing*; Amsterdam: John Benjamins; 23-50.

Ruiz de Mendoza Ibáñez, F. J. and M. Sandra Pena. 2005. Conceptual interaction, cognitive operations, and projection spaces. ???

Sperber, Dan and Deidre Wilson. 2008. A deflationary account of metaphor. In R. Gibbs, ed., *The Cambridge Handbook of Metaphor and Thought*, 84-105. New York: Cambridge Universtiy Press.

Vega Moreno, R. E. 2007. *Creativity and Convention. The Pragmatics of Everyday Figurative Speech.* Amsterdam/Philadelphia: John Benjamins.

Wilson, D. & Carston, R. 2006. “Metaphor, relevance and the ‘emergent property' issue”. *Mind & Language* 21: 404-433.

Wilson, D. & Carston, R. 2008. “Metaphor and the ‘emergent property’ problem: A relevance-theoretic treatment”. *The Baltic International Yearbook of Cognition,* *Logic and Communication* 3 (2007), 1-40.

Wilson, D. 2009. Parallels and differences in the treatment of metaphor in Relevance theory and Cognitive Linguistics. *Studies in Pragmatics* 11, 42-60
